# Supplementary material for: Development and validation of a multivariable genotype-informed gestational diabetes prediction algorithm for clinical use in the Mexican population: insights into susceptibility mechanisms
Source: PubMed Central journal article supplement — BMJ Open Diabetes Res Care. 2023 Apr 21;11(2):e003046. doi: 10.1136/bmjdrc-2022-003046 (PMC10124192; doi:10.1136/bmjdrc-2022-003046), 2023-04-21
Supplement: bmjdrc-2022-003046supp001.pdf [file bmjdrc-2022-003046supp001.pdf]

**Supplementary Material S1****Table S1 Cohorts used for algorithm development and validation**

|                     | <b>Cohort</b>                       | <b>Cases</b> | <b>Controls</b> |
|---------------------|-------------------------------------|--------------|-----------------|
| Development         | CME (70% samples, training dataset) | 75           | 328             |
| Internal validation | CME (30% samples, testing dataset)  | 32           | 141             |
| External validation | HMPMPS                              | 32           | 199             |

CME, Cuido mi Embarazo; HMPMPS, "Mónica Pretelini Sáenz" Maternal Perinatal Hospital.
