# Supplementary material for: Development and validation of a multivariable genotype-informed gestational diabetes prediction algorithm for clinical use in the Mexican population: insights into susceptibility mechanisms
Source: PubMed Central journal article supplement — BMJ Open Diabetes Res Care. 2023 Apr 21;11(2):e003046. doi: 10.1136/bmjdrc-2022-003046 (PMC10124192; doi:10.1136/bmjdrc-2022-003046), 2023-04-21
Supplement: bmjdrc-2022-003046supp003.pdf [file bmjdrc-2022-003046supp003.pdf]

## Supplementary Material S3

Table S2 List of 114 SNPs examined in this study

| SNV ID     | Gene                          | Effect (risk) allele | Reference allele | Glycemic trait based on Powe et al. 2018 [6]         | Other                                | Reference |
|------------|-------------------------------|----------------------|------------------|------------------------------------------------------|--------------------------------------|-----------|
| rs1051266  | <i>SLC19A1</i>                | T                    | C                |                                                      | Vitamin B12, Neural tube defect      | 5         |
| rs10811661 | <i>CDKN2A/B</i>               | T                    | C                | Type 2 diabetes, Fasting glucose, Insulin production |                                      | 1, 2, 6-9 |
| rs10830962 | <i>MTNR1B</i>                 | G                    | C                |                                                      | Gestational diabetes/Type 2 diabetes | 4, 5      |
| rs10998646 | <i>SUPV3L1 / HKDC1</i>        | T                    | G                |                                                      | Gestational diabetes                 | 4         |
| rs11254363 | <i>CUBN</i>                   | G                    | A                |                                                      | Vitamin B12, Neural tube defect      | 5         |
| rs1387153  | <i>LOC100128354 / MTNR1B</i>  | T                    | C                |                                                      | Gestational diabetes/Type 2 diabetes | 3, 4, 8   |
| rs17085593 | <i>LOC441097 / PCSK1</i>      | G                    | C                |                                                      | Gestational diabetes                 | 4         |
| rs17727202 | <i>IRX1 / LOC340094</i>       | T                    | C                |                                                      | Gestational diabetes                 | 4         |
| rs1801131  | <i>MTHFR</i>                  | G                    | T                |                                                      | Folate                               | 4         |
| rs1801133  | <i>MTHFR</i>                  | A                    | G                |                                                      | Folate                               | 4         |
| rs1801222  | <i>CUBN</i>                   | A                    | G                |                                                      | Vitamin B12, Neural tube defect      | 5         |
| rs1805087  | <i>MTR</i>                    | G                    | A                |                                                      | Folate                               | 4, 8      |
| rs2119289  | <i>FIGN</i>                   | G                    | C                |                                                      | Folate                               | 5         |
| rs2237892  | <i>KCNQ1</i>                  | C                    | T                | Type 2 diabetes                                      |                                      | 1, 2, 6-9 |
| rs3746750  | <i>C20orf59</i>               | G                    | A                |                                                      | Gestational diabetes                 | 4         |
| rs4607517  | <i>GCK</i>                    | A                    | G                | Fasting glucose                                      |                                      | 4, 6      |
| rs4746822  | <i>HKDC1</i>                  | T                    | C                |                                                      | Gestational diabetes                 | 4         |
| rs4841132  | <i>PPP1R3B / LOC100129150</i> | G                    | A                | Fasting glucose, Fasting Insulin                     |                                      | 4, 6      |

|            |                               |   |   |                                                                       |                                      |              |
|------------|-------------------------------|---|---|-----------------------------------------------------------------------|--------------------------------------|--------------|
| rs560887   | <i>G6PC2</i>                  | T | C | Fasting glucose                                                       |                                      | 4, 96        |
| rs563694   | <i>G6PC2 / ABCB11</i>         | C | A |                                                                       | Gestational diabetes                 | 4            |
| rs6235     | <i>PCSK1</i>                  | G | C |                                                                       | Gestational diabetes                 | 4            |
| rs6517656  | <i>BACE2</i>                  | G | A |                                                                       | Gestational diabetes                 | 4            |
| rs7004769  | <i>PPP1R3B / LOC100129150</i> | G | A |                                                                       | Gestational diabetes                 | 4            |
| rs737288   | <i>BACE2</i>                  | T | G |                                                                       | Gestational diabetes                 | 4            |
| rs780094   | <i>GCKR</i>                   | T | C | Type 2 diabetes, Fasting glucose, Fasting Insulin, Insulin Resistance |                                      | 4,6          |
| rs8050136  | <i>FTO</i>                    | A | C |                                                                       | Obesity                              | 1, 2, 7-9    |
| rs12779790 | <i>CDC123/CAMK1D</i>          | G | A |                                                                       | Gestational diabetes                 | 4            |
| rs13266634 | <i>SLC30A8</i>                | C | T |                                                                       | Gestational diabetes/Type 2 diabetes | 1, 2, 7-9    |
| rs13342232 | <i>SLC16A11</i>               | G | A |                                                                       | Gestational diabetes/Type 2 diabetes | 8            |
| rs1799884  | <i>GCK</i>                    | T | C |                                                                       | Gestational diabetes/Type 2 diabetes | 4            |
| rs1801278  | <i>IRS1</i>                   | T | C |                                                                       | Gestational diabetes/Type 2 diabetes | 4            |
| rs4402960  | <i>IGF2BP2</i>                | T | G | Type 2 diabetes                                                       |                                      | 1, 2, 6-9    |
| rs573904   | <i>SARDH</i>                  | T | C |                                                                       | Folate                               | 5            |
| rs7756134  | <i>PARK2</i>                  | T | C |                                                                       | Gestational diabetes                 | 4            |
| rs7903146  | <i>TCF7L2</i>                 | T | C | Type 2 diabetes, Insulin production                                   |                                      | 1, 2, 3, 6-9 |
| rs10814916 | <i>GLIS3</i>                  | C | A |                                                                       |                                      | 3            |
| rs10830963 | <i>MTNR1B</i>                 | G | C | Fasting glucose, Insulin production                                   |                                      | 3,6          |
| rs11558471 | <i>SLC30A8</i>                | A | G | Fasting glucose                                                       |                                      | 6            |
| rs11708067 | <i>ADCY5</i>                  | A | G | Type 2 diabetes, Fasting glucose                                      |                                      | 6            |
| rs11715915 | <i>AMT</i>                    | C | T | Fasting glucose                                                       |                                      | 6            |
| rs11787792 | <i>GPSM1</i>                  | A | G |                                                                       |                                      | 3            |
| rs12899811 | <i>PRC1</i>                   | G | A | Type 2 diabetes, Insulin production                                   |                                      | 6            |

|            |                           |   |   |                                                      |      |
|------------|---------------------------|---|---|------------------------------------------------------|------|
| rs1496653  | <i>UBE2E2</i>             | A | G | Type 2 diabetes, Insulin production                  | 6    |
| rs17676067 | <i>GLP2R</i>              | C | T | Type 2 diabetes, Insulin production                  | 6    |
| rs17762454 | <i>RRB1</i>               | T | C | Fasting glucose                                      | 6    |
| rs1801282  | <i>PPARG</i>              | C | G | Type 2 diabetes, Insulin Resistance                  | 6    |
| rs2785980  | <i>LYPLAL1</i>            | T | C | Fasting Insulin                                      | 6    |
| rs340874   | <i>PROX1</i>              | C | T | Type 2 diabetes, Fasting glucose                     | 6    |
| rs34872471 | <i>TCF7L2</i>             | C | T |                                                      | 3    |
| rs3802177  | <i>SLC30A8</i>            | G | A | Type 2 diabetes, Insulin production                  | 3, 6 |
| rs4458523  | <i>WFS1</i>               | G | T | Type 2 diabetes, Insulin Resistance                  | 6    |
| rs4502156  | <i>C2CD4A/NLF1/VPS13C</i> | T | C | Type 2 diabetes, Insulin production                  | 6    |
| rs4506565  | <i>TCF7L2</i>             | T | A | Fasting glucose                                      | 3, 6 |
| rs459193   | <i>ANKRD55/MAP3K</i>      | G | A | Type 2 diabetes, Fasting Insulin, Insulin Resistance | 6    |
| rs4691380  | <i>PDGFC</i>              | C | T | Fasting Insulin, Insulin Resistance                  | 6    |
| rs5215     | <i>KCNJ11</i>             | C | T | Type 2 diabetes, Insulin production                  | 6    |
| rs6048205  | <i>FOXA2</i>              | A | G | Fasting glucose                                      | 6    |
| rs6072275  | <i>TOP1</i>               | A | G | Fasting glucose                                      | 6    |
| rs7041847  | <i>GLIS3</i>              | A | G |                                                      | 3    |
| rs731839   | <i>PEPD</i>               | G | A | Fasting Insulin                                      | 6    |
| rs7607980  | <i>COBLL1-GRB14</i>       | T | C | Fasting Insulin, Insulin Resistance                  | 6    |
| rs7651090  | <i>IGF2BP2</i>            | G | A | Fasting glucose                                      | 6    |
| rs7756992  | <i>CDKAL1</i>             | G | A | Type 2 diabetes, Insulin production                  | 6    |
| rs7957197  | <i>HNF1A</i>              | T | A | Type 2 diabetes, Insulin production                  | 3, 6 |
| rs933360   | <i>GRB10</i>              | T | C | Insulin production                                   | 6    |
| rs9379084  | <i>RREB1</i>              | A | G |                                                      | 3    |
| rs10747083 | <i>P2RX2</i>              | A | G | Fasting glucose                                      | 6    |
| rs1106306  | <i>CCND2</i>              | C | T | Insulin Resistance                                   | 6    |
| rs11603334 | <i>ARAP1</i>              | G | A | Fasting glucose                                      | 6    |
| rs1167800  | <i>HIP1</i>               | A | G | Fasting Insulin                                      | 6    |

|            |                       |   |   |                                     |   |
|------------|-----------------------|---|---|-------------------------------------|---|
| rs11920090 | <i>SLC2A2</i>         | T | A | Fasting glucose                     | 6 |
| rs12549902 | <i>ANK1</i>           | A | G | Insulin production                  | 6 |
| rs1421085  | <i>FTO</i>            | C | T | Fasting Insulin                     | 6 |
| rs1483121  | <i>OR4S1</i>          | G | A | Fasting glucose                     | 6 |
| rs1530559  | <i>YSK4/MAP3K19</i>   | A | G | Fasting Insulin                     | 6 |
| rs16996148 | <i>CILP2</i>          | T | G | Type 2 diabetes, Insulin Resistance | 6 |
| rs17036328 | <i>PPARG</i>          | T | C | Fasting Insulin                     | 6 |
| rs17265513 | <i>ZHX3</i>           | C | T | Type 2 diabetes, Insulin production | 6 |
| rs174550   | <i>FADS1</i>          | T | C | Fasting glucose, Insulin production | 6 |
| rs2191349  | <i>DGKB/TMEM195</i>   | T | G | Type 2 diabetes, Fasting glucose    | 6 |
| rs2302593  | <i>GIPR</i>           | C | G | Fasting glucose                     | 6 |
| rs2334499  | <i>DUSP8</i>          | T | C | Type 2 diabetes, Insulin production | 6 |
| rs2657879  | <i>GLS2</i>           | G | A | Fasting glucose                     | 6 |
| rs2943634  | <i>IRS1</i>           | C | A | Fasting Insulin, Insulin Resistance | 6 |
| rs35767    | <i>IGF1</i>           | G | A | Fasting Insulin, Insulin Resistance | 6 |
| rs3822072  | <i>FAM13A1</i>        | A | G | Fasting Insulin                     | 6 |
| rs3829109  | <i>LOC728489</i>      | G | A | Fasting glucose                     | 6 |
| rs4646949  | <i>UHRF1BP1</i>       | T | G | Fasting Insulin                     | 6 |
| rs576674   | <i>KL</i>             | G | A | Fasting glucose, Insulin production | 6 |
| rs6742799  | <i>RBMS1</i>          | A | C | Type 2 diabetes, Insulin Resistance | 6 |
| rs6943153  | <i>GRB10</i>          | T | C | Fasting glucose, Insulin Resistance | 6 |
| rs7034200  | <i>GLIS3</i>          | A | C | Fasting glucose                     | 6 |
| rs7923866  | <i>HHEX/IDE/KIF11</i> | C | T | Insulin production                  | 6 |
| rs7944584  | <i>MADD</i>           | A | T | Fasting glucose                     | 6 |
| rs9368222  | <i>CDKAL1</i>         | A | C | Fasting glucose                     | 6 |
| rs9884482  | <i>TET2</i>           | C | T | Fasting Insulin                     | 6 |
| rs10885122 | <i>ADRA2A</i>         | G | T | Fasting glucose                     | 6 |
| rs11071657 | <i>C2CD4B</i>         | A | G | Fasting glucose                     | 6 |
| rs11257655 | <i>CDC123/CAMK1D</i>  | T | C | Type 2 diabetes, Insulin production | 6 |

|            |               |   |   |                                     |                               |    |
|------------|---------------|---|---|-------------------------------------|-------------------------------|----|
| rs11605924 | <i>CRY2</i>   | A | C | Fasting glucose, Insulin production |                               | 6  |
| rs11671664 | <i>GIPR</i>   | A | G | Insulin production                  |                               | 6  |
| rs1245471  | <i>BCL2</i>   | T | G | Insulin Resistance                  |                               | 6  |
| rs13179048 | <i>PCSK1</i>  | C | A | Fasting glucose                     |                               | 6  |
| rs1371614  | <i>DPYSL5</i> | T | C | Fasting glucose                     |                               | 6  |
| rs16913693 | <i>IKBKAP</i> | T | G | Fasting glucose                     |                               | 6  |
| rs2167270  | <i>LEP</i>    | G | A |                                     | Gestational diabetes, obesity | 10 |
| rs2241766  | <i>ADIPOQ</i> | T | G |                                     | Gestational diabetes, obesity | 10 |
| rs2293941  | <i>PDX1</i>   | A | G | Fasting glucose                     |                               | 6  |
| rs2745353  | <i>RSPO3</i>  | T | C | Fasting Insulin                     |                               | 6  |
| rs3783347  | <i>WARS</i>   | G | T | Fasting glucose                     |                               | 6  |
| rs4430796  | <i>HNF1B</i>  | G | A | Type 2 diabetes, Insulin production |                               | 6  |
| rs4865796  | <i>ARL15</i>  | A | G | Fasting Insulin, Insulin Resistance |                               | 6  |
| rs7708285  | <i>ZBED3</i>  | G | A | Fasting glucose                     |                               | 6  |
| rs9921586  | <i>CTRB2</i>  | G | T | Type 2 diabetes, Insulin production |                               | 6  |

SNP, single nucleotide polymorphism.

## References

1. Cho NH, Jang HC. Better understanding and new insight of genetic risk loci for gestational diabetes mellitus. *J Diabetes Invest* 2012;3:424–6.
2. Zhang C, Bao W, Rong Y, et al. Genetic variants and the risk of gestational diabetes mellitus: a systematic review. *Hum Reprod Update* 2013;19(4):376–90.
3. Ding M, Chavarro J, Olsen S, et al. Genetic variants of gestational diabetes mellitus: a study of 112 SNPs among 8722 women in two independent populations. *Diabetologia* 2018;61(8):1758–68.
4. Hayes MG, Urbanek M, Hivert MF, et al. Identification of HKDC1 and BACE2 as genes influencing glycemic traits during pregnancy through genome-wide association studies. *Diabetes* 2013;62(9):3282–91.
5. Huerta-Chagoya A, Vázquez-Cárdenas P, Moreno-Macías H, et al. Genetic determinants for gestational diabetes mellitus and related metabolic traits in Mexican women. *PLoS One* 2015;10:e0126408.
6. Powe CE, Nodzenski M, Talbot O, et al. Genetic determinants of glycemic traits and the risk of gestational diabetes mellitus. *Diabetes* 2018;67:2703–09.
7. Saxena R, Elbers CC, Guo Y, et al. Large-scale gene-centric meta-analysis across 39 studies identifies type 2 diabetes loci. *Am J Hum Genet* 2012;90:410–425.
8. DIAbetes Genetics Replication And Meta-analysis (DIAGRAM) Consortium; Asian Genetic Epidemiology Network Type 2 Diabetes (AGEN-T2D) Consortium; South Asian Type 2 Diabetes (SAT2D) Consortium; Genome-wide trans-ancestry meta-analysis provides insight into the genetic architecture of type 2 diabetes susceptibility. *Nat Genet* 2014;46(3):234-244.
9. Wu L, Ciu L, Tam WH, et al. Genetic variants associated with gestational diabetes mellitus: a meta-analysis and subgroup analysis. *Sci Rep* 2016;6:30539.
10. Pawlik A, Teler J, Maciejewska A, et al. Adiponectin and leptin gene polymorphisms in women with gestational diabetes mellitus. *J Assist Reprod Genet* 2007;34(4):511-516.
