# Supplementary material for: Development and validation of a multivariable genotype-informed gestational diabetes prediction algorithm for clinical use in the Mexican population: insights into susceptibility mechanisms
Source: PubMed Central journal article supplement — BMJ Open Diabetes Res Care. 2023 Apr 21;11(2):e003046. doi: 10.1136/bmjdrc-2022-003046 (PMC10124192; doi:10.1136/bmjdrc-2022-003046), 2023-04-21
Supplement: bmjdrc-2022-003046supp004.pdf [file bmjdrc-2022-003046supp004.pdf]

**Supplementary Material S4**

**Table S3 List of 114 SNPs examined in this study**
