# Supplementary material for: Development and validation of a multivariable genotype-informed gestational diabetes prediction algorithm for clinical use in the Mexican population: insights into susceptibility mechanisms
Source: PubMed Central journal article supplement — BMJ Open Diabetes Res Care. 2023 Apr 21;11(2):e003046. doi: 10.1136/bmjdrc-2022-003046 (PMC10124192; doi:10.1136/bmjdrc-2022-003046), 2023-04-21
Supplement: bmjdrc-2022-003046supp005.pdf [file bmjdrc-2022-003046supp005.pdf]

**Supplementary Material S5****Table S4 Student's t-test analysis of significant attributes**

| <b>Attribute</b>     | <b>t</b> | <b>p-value</b> |
|----------------------|----------|----------------|
| Age                  | -3.6327  | 0.0004         |
| Pregestational BMI   | -4.7508  | 4.51E-06       |
| Previous pregnancies | -2.4261  | 0.0165         |
| rs10830962           | -2.6602  | 0.0087         |
| rs1387153            | -3.6097  | 0.0004         |
| rs4607517            | -2.8110  | 0.0056         |
| rs1799884            | -2.3641  | 0.0194         |
| rs1801278            | 2.7709   | 0.0056         |
| rs10830963           | -3.6601  | 0.0004         |
| rs11715915           | -3.0158  | 0.0029         |
| rs340874             | -2.5366  | 0.0122         |
| rs6048205            | -3.1931  | 0.0015         |
| rs9379084            | 3.2286   | 0.0014         |
| rs16996148           | -2.9484  | 0.0037         |
| rs2943634            | -2.3930  | 0.0177         |
| rs6742799            | -2.6378  | 0.0090         |
| rs2745353            | -2.5321  | 0.0123         |

BMI, body mass index.
