# Supplementary material for: Development and validation of a multivariable genotype-informed gestational diabetes prediction algorithm for clinical use in the Mexican population: insights into susceptibility mechanisms
Source: PubMed Central journal article supplement — BMJ Open Diabetes Res Care. 2023 Apr 21;11(2):e003046. doi: 10.1136/bmjdrc-2022-003046 (PMC10124192; doi:10.1136/bmjdrc-2022-003046), 2023-04-21
Supplement: bmjdrc-2022-003046supp006.pdf [file bmjdrc-2022-003046supp006.pdf]

**Supplementary Material S6****Table S5 Analysis of predictive values at different thresholds**

| Threshold | Sensitivity | Specificity | PPV    | NPV    |
|-----------|-------------|-------------|--------|--------|
| 0.15      | 0.8598      | 0.6449      | 0.7077 | 0.8214 |
| 0.17      | 0.8131      | 0.6822      | 0.7191 | 0.7849 |
| 0.18      | 0.7944      | 0.7103      | 0.7328 | 0.7755 |
| 0.2       | 0.7477      | 0.7477      | 0.7477 | 0.7477 |
| 0.25      | 0.6542      | 0.7944      | 0.7609 | 0.6967 |

NPV, negative predictive value; PPV, positive predictive value.
